# Supplementary material for: Nitrogen–phosphorus-associated metabolic activities during the development of a cyanobacterial bloom revealed by metatranscriptomics
Source: PubMed Central journal article supplement (PMC6385219; doi:10.1038/s41598-019-38481-2), 2019-02-21
Supplement: 41598_2019_38481_MOESM1_ESM.pdf [file 41598_2019_38481_MOESM1_ESM.pdf]

**Nitrogen–phosphorus-associated metabolic activities during the development of a cyanobacterial bloom revealed by metatranscriptomics**

Jingrang Lu\*<sup>1</sup>, Bo Zhu<sup>2</sup>, Ian Struewing<sup>3</sup>, Ning Xu<sup>2</sup>, & Shunshan Duan<sup>2</sup>

<sup>1</sup>U.S. Environmental Protection Agency Office of Research and Development, Cincinnati, OH, USA

<sup>2</sup>Institute of Hydrobiology, Jinan University, Guangzhou, Guangdong, China

<sup>3</sup>Pegasus Technical Services, Cincinnati, OH, USA

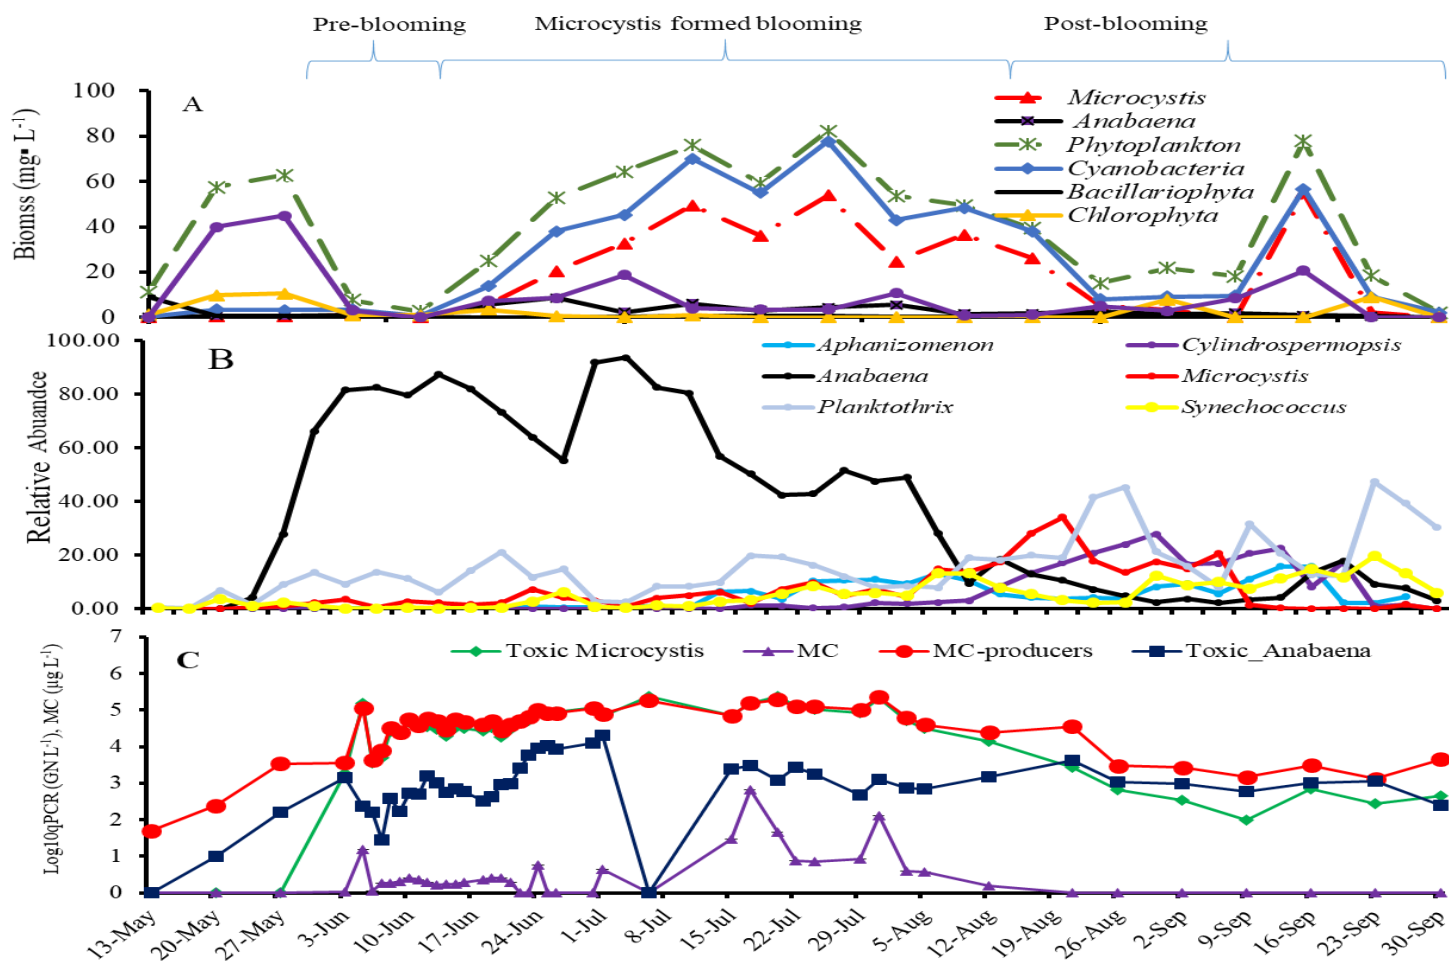

Fig. S1. Demonstration of temporal variations during the periods of pre-blooming, blooming and post-blooming according to (A) of the biomass of total phytoplankton, cyanobacteria and *Microcystis*, based on the data of algal counts using microscope (Chen et al. 2017), (B) main cyanobacterial genera and (C) total microcystin producers, toxic *Microcystis* and toxic *Anabaena* as measured by qPCR and total microcystin detected using LC-MS/MS for the same sampling site as in this study in Harsha Lake in 2015

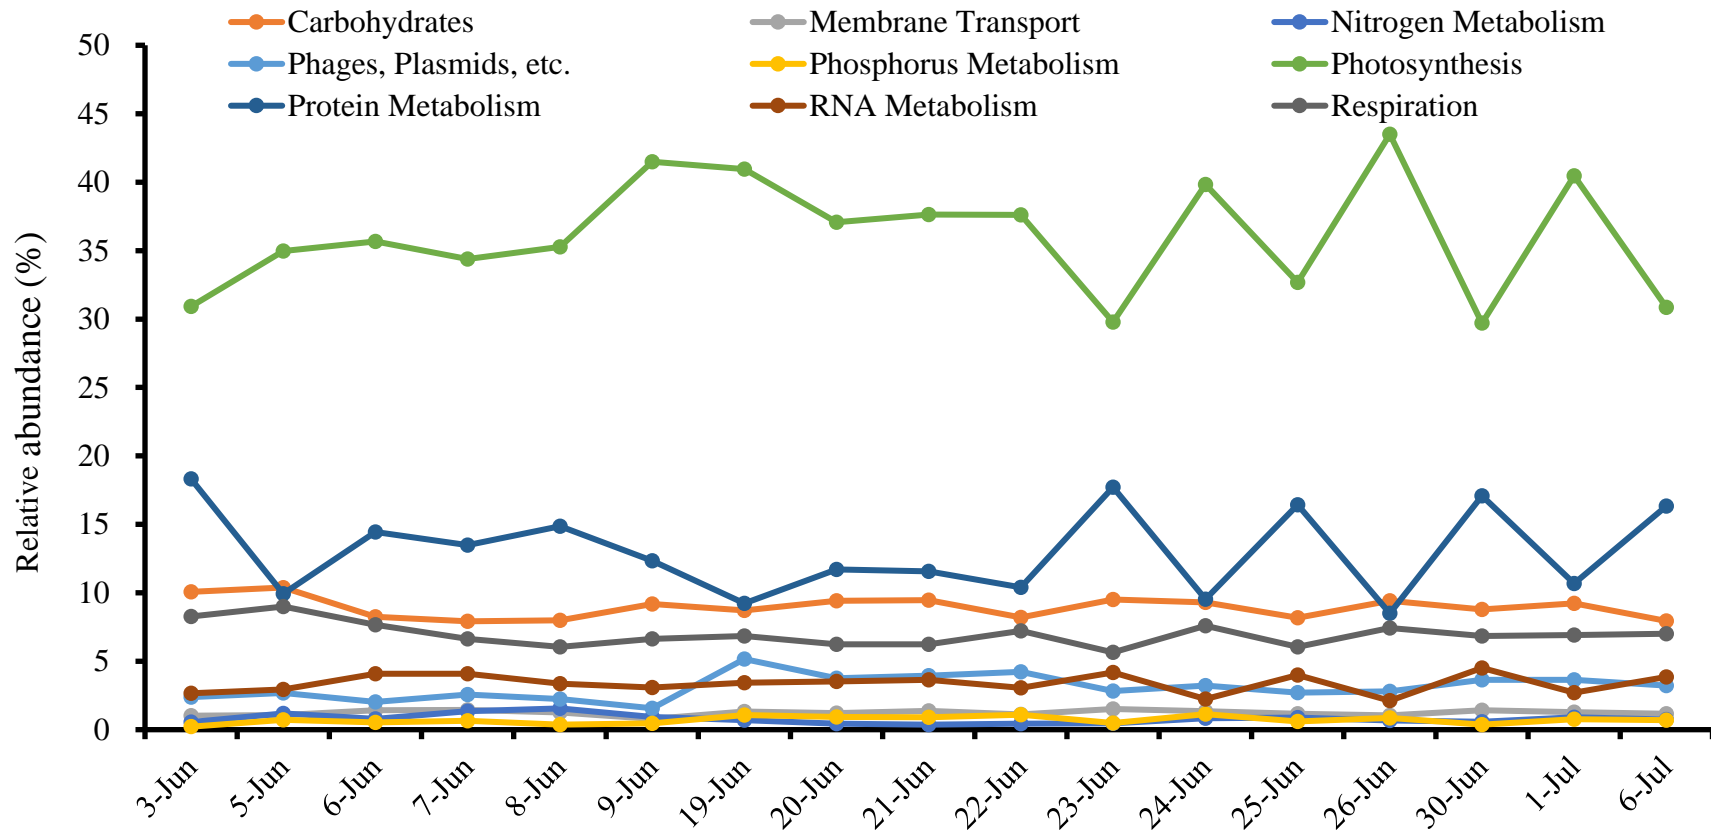

Fig. S2. Relative abundance of major functional transcriptome categories

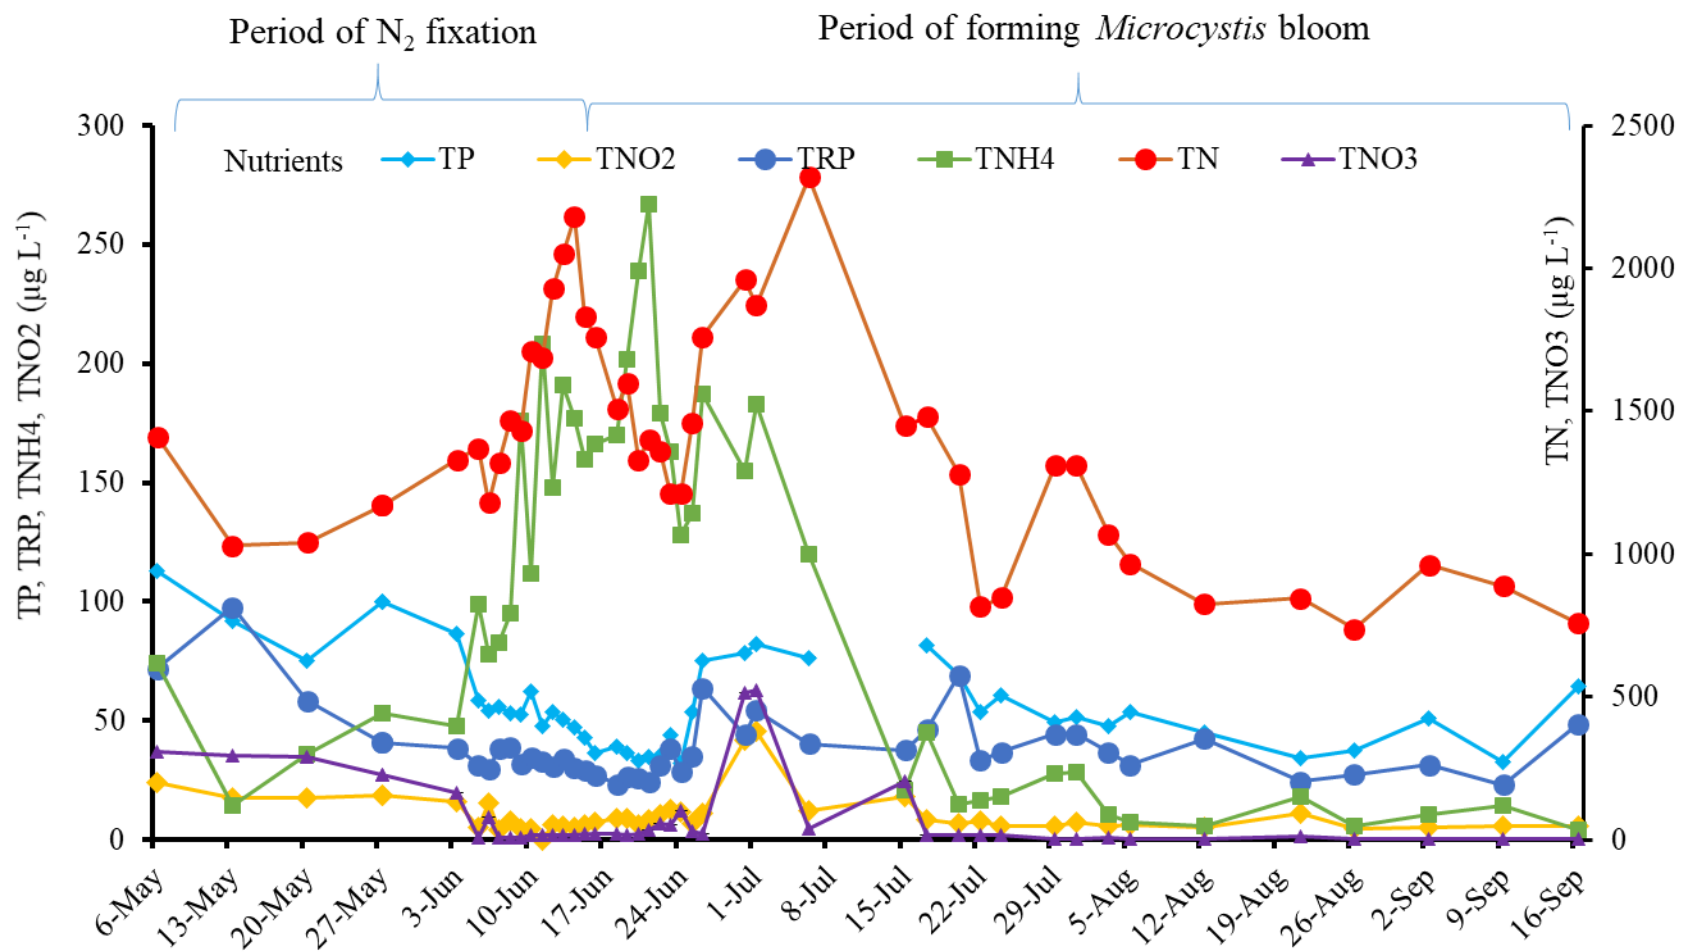

Fig. S3. Variations of nutrients measured in total (T) for nitrogen (TN), nitrate (TNO3), nitrite (TNO2), ammonium (TNH4), phosphorus (TP) and reactive phosphorus (TRP) in Harsha Lake

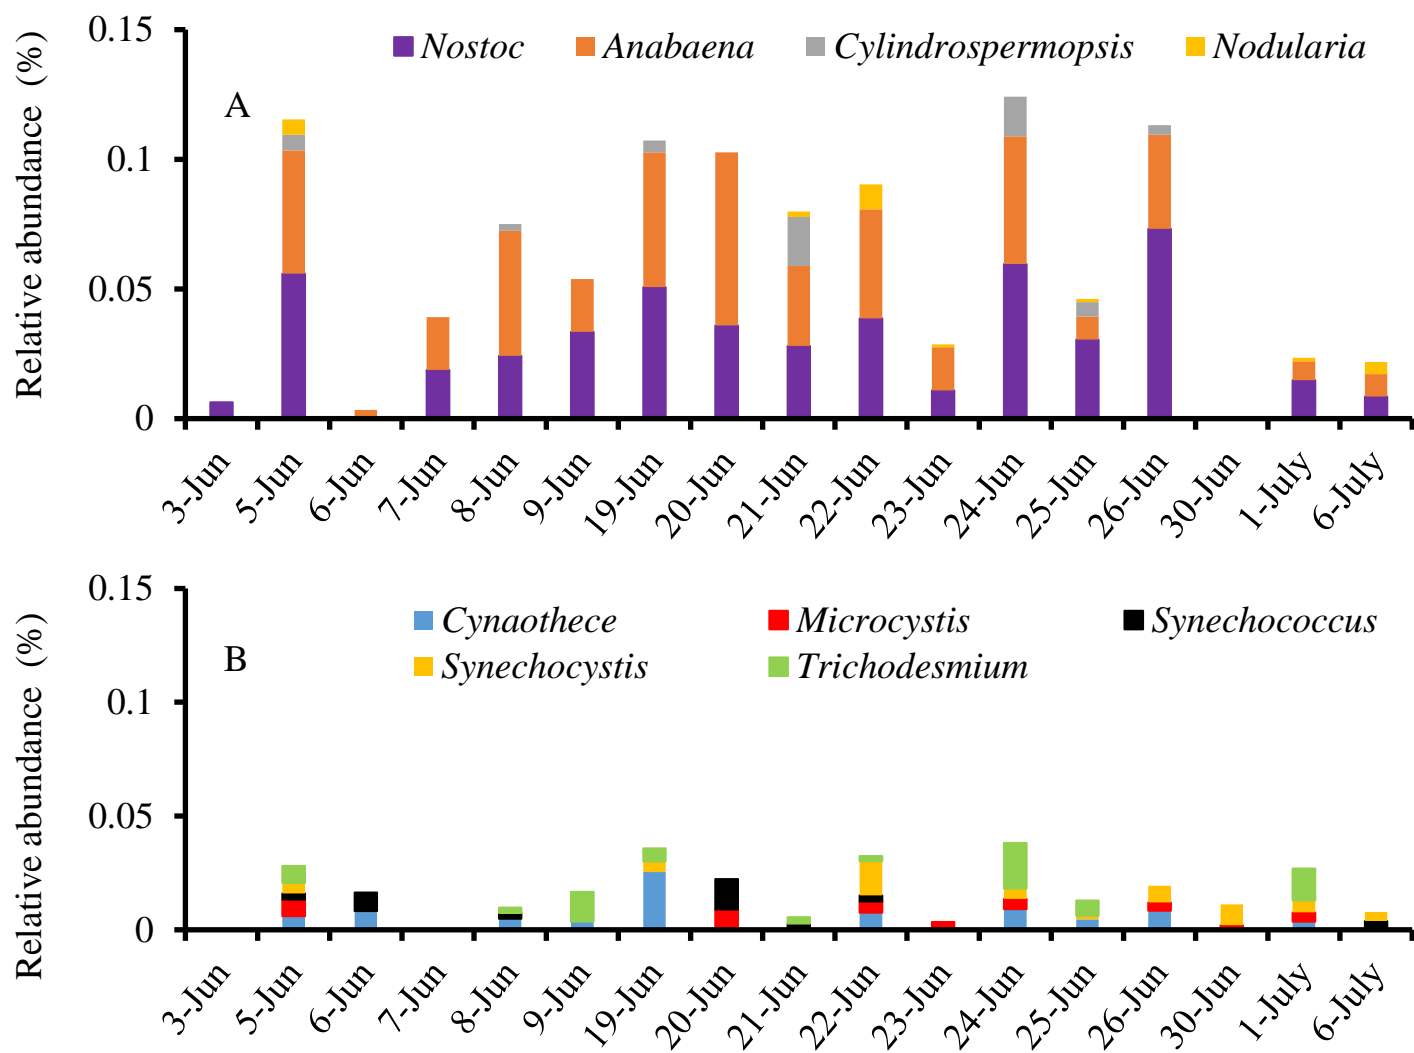

Fig. S4 Relative abundances of sequences similar to phosphorus metabolic pathway: (A) major genera within *Nostocales*, (B) major genera within Chroococcales and Oscillatoriales.

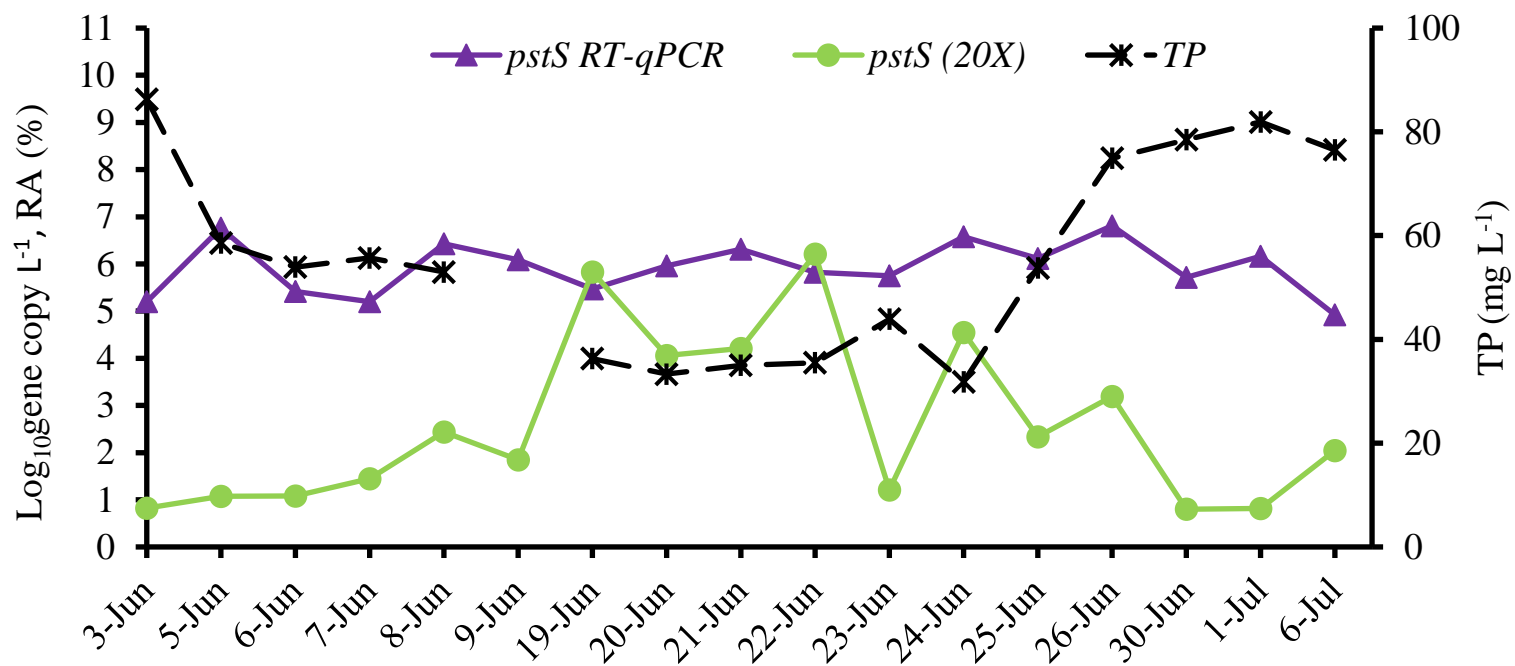

**Fig. S5.** -Fold expression profiles of genes associated with phosphorus metabolism as measured by qPCR data.

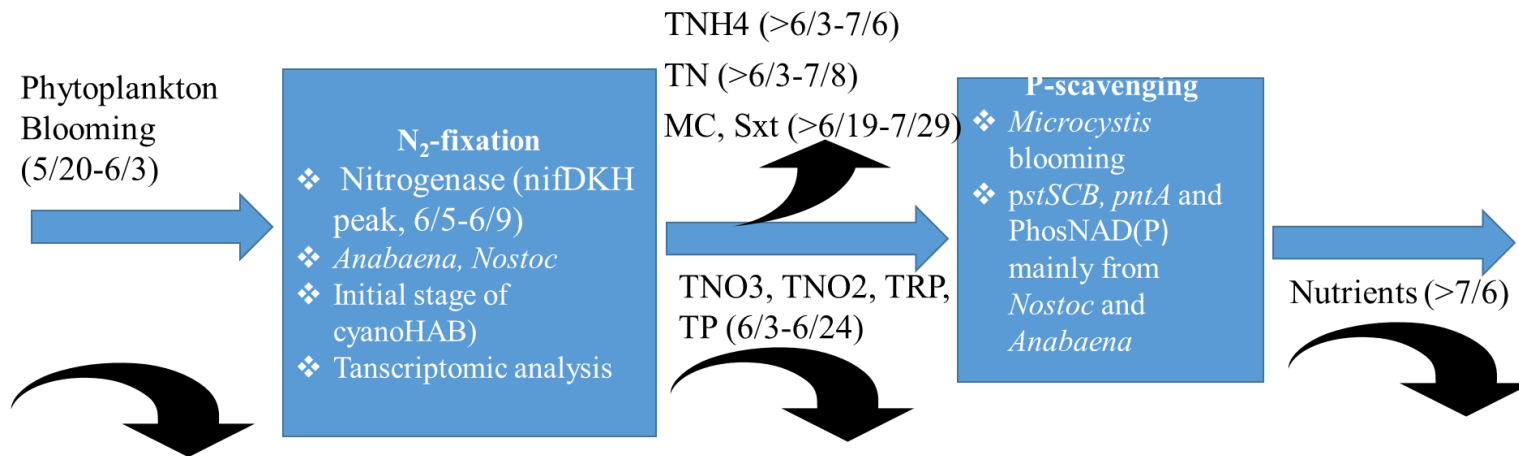

Fig. S6. Diagram of N<sub>2</sub>-fixation and P-scavenge

Table S1. qPCR Primers used in this study

| Primer                   | Sequence (5' → 3')                                           | Target                  | Product length | Tm (C) | Limit of detection (copy number reaction <sup>-1</sup> ) | Reference         |
|--------------------------|--------------------------------------------------------------|-------------------------|----------------|--------|----------------------------------------------------------|-------------------|
| mcyG-67F                 | CAA CCC AAC AGG TTC TTA AAG C                                | <i>Microcystis</i> mcyG | 244            | 60     | 10                                                       | Ngwa et al., 2012 |
| mcyG-310R                | TGA GGC AAG GTT TCC TCT TG                                   |                         |                |        |                                                          |                   |
| stxA5f<br>stxArr         | CGC TAT ACC CAC GGA TTT GTT<br>GGG ATC AGC AGT AGT CCA TCT A | Saxitoxin               | 120            | 60     | 10                                                       | This study        |
| pstSf3<br>pstSr3         | TGG AAT GTT ACC AGC AGG AAT AA<br>AGT GCT GCT TGA CGT AAA CT | A Flos Aq, AFA          | 110            | 60     | 10                                                       | This study        |
| nif_anaF6<br>nif_anaR6   | ATG CCT ATC CGT GAA GGT AAA G<br>CCA CCG GAG TGA GCA TAT TT  | Ana, Nos, Cylin         | 86             | 60     | 10                                                       | This study        |
| nif_nostF3<br>nif_nostR3 | ATC GTT CAA CAC GCA GAA TTG<br>TCA TCC ATT TCG ATA GGT GTG G | Ana, Nos, Cyl           | 90             | 60     | 10                                                       | This study        |



Table S2, Summary of library sequences

| Item                                    | Quantity         |
|-----------------------------------------|------------------|
| Library number                          | 17               |
| Total (read)                            | 15,899,228       |
| Average leangth (bp)                    | 199.02 ± 75.64   |
| Average GC content (%)                  | 47.47 ± 6.71     |
| Range per library (read)                | 21,326 - 499,108 |
| Average (read)                          | 274,124          |
| Total predicted protein features (read) | 741,631          |
| Annotated (read) and percentage (%)     | 277015, 37.35    |

Table S3. cDNA sequence hit<sup>1</sup> nitrogenase gene from the genome data of N<sub>2</sub>-fixation cyanobacterial isolates

| Accession No | Gene                                                | NCBI Organism                  | Order         | Reference                 |
|--------------|-----------------------------------------------------|--------------------------------|---------------|---------------------------|
| YP_325033    | twin-arginine translocation pathway signal protein  | Anabaena variabilis ATCC 29413 | Nostocales    | Schrautemeier et al. 1995 |
| YP_325034    | nitrate transport permease                          | Anabaena variabilis ATCC 29413 | heterocystous |                           |
| YP_320669    | hypothetical protein                                | Anabaena variabilis ATCC 29413 |               |                           |
| YP_323462    | ammonium transporter                                | Anabaena variabilis ATCC 29413 |               |                           |
| YP_324738    | nitrogenase cofactor biosynthesis protein NifB      | Anabaena variabilis ATCC 29413 |               |                           |
| YP_325035    | nitrate transport ATP-binding subunits C and D      | Anabaena variabilis ATCC 29413 |               |                           |
| YP_320658    | nitrogen regulatory protein P-II                    | Anabaena variabilis ATCC 29413 |               |                           |
| YP_324416    | nitrogenase reductase                               | Anabaena variabilis ATCC 29413 |               |                           |
| YP_321394    | twin-arginine translocation pathway signal protein  | Anabaena variabilis ATCC 29413 |               |                           |
| YP_324417    | nitrogenase molybdenum-iron protein subunit alpha   | Anabaena variabilis ATCC 29413 |               |                           |
| YP_323460    | ammonium transporter                                | Anabaena variabilis ATCC 29413 |               |                           |
| YP_001864115 | nitrogenase molybdenum-iron protein beta chain NifK | Nostoc punctiforme PCC 73102   |               | Summers et al. 1995       |
| YP_001865159 | nitrite transporter NrtP                            | Nostoc punctiforme PCC 73102   |               |                           |
| YP_001865160 | ferredoxin-nitrite reductase                        | Nostoc punctiforme PCC 73102   |               |                           |
| YP_001864139 | Fe-S cluster assembly protein NifU                  | Nostoc punctiforme PCC 73102   |               |                           |
| NP_485035    | ammonium transporter                                | Nostoc sp. PCC 7120            |               |                           |
| NP_484652    | nitrate transport nitrate-binding protein           | Nostoc sp. PCC 7120            |               |                           |
| NP_487398    | 3-hydroxyacid dehydrogenase                         | Nostoc sp. PCC 7120            |               |                           |
| NP_484656    | nitrate reductase                                   | Nostoc sp. PCC 7120            |               |                           |
| NP_485557    | nitrogen fixation protein                           | Nostoc sp. PCC 7120            |               |                           |
| NP_484654    | nitrate transport ATP-binding protein               | Nostoc sp. PCC 7120            |               |                           |

|              |                                                   |                                                                 |                   |                                 |
|--------------|---------------------------------------------------|-----------------------------------------------------------------|-------------------|---------------------------------|
| ZP_06306629  | Glutamate-1-semialdehyde-                         | Cylindrospermopsis raciborskii CS-505]                          |                   | Willis et al.<br>2016           |
| ZP_06306743  | Nitrite/sulfite reductas                          | Cylindrospermopsis raciborskii CS-505]                          |                   |                                 |
| ZP_06306629  | Glutamate-1-semialdehyde-                         | Cylindrospermopsis raciborskii CS-505]                          |                   |                                 |
| ZP_06306741  | Nitrate transport permease                        | Cylindrospermopsis raciborskii CS-505]                          |                   |                                 |
| ZP_06306839  | Nitrate transport ATP-binding subunits C and D    | Cylindrospermopsis raciborskii CS-505]                          |                   |                                 |
| ZP_01631054  | UDP-N-acetylmuramoylalanyl-D-glutamate--          | Nodularia spumigena CCY9414]                                    |                   | Vintila &<br>El-Shehawy<br>2017 |
| ZP_01630726  | Nitrogen regulatory protein P-II (Gln             | Nodularia spumigena CCY9414]                                    |                   |                                 |
| ZP_01628441  | nitrogen fixation protein                         | Nodularia spumigena CCY9414]                                    |                   |                                 |
| ZP_01630828  | glutamate--ammonia ligase                         | Nodularia spumigena CCY9414]                                    |                   |                                 |
| ZP_01629158  | folylpolyglutamate synthase                       | Nodularia spumigena CCY9414]                                    |                   |                                 |
| ZP_03272006  | nitrogen-fixing NifU domain protein               | Arthrospira maxima CS-328                                       | Oscillatoriales   | Carrieri et al.<br>2011         |
| ZP_03274031  | Mo-dependent nitrogenase family protein           | Arthrospira maxima CS-328                                       | non-heterocystous |                                 |
| ZP_06383243  | nitrogen-fixing NifU domain protein               | Arthrospira platensis str. Paraca                               | diazotroph        |                                 |
| ZP_06383913  | Mo-dependent nitrogenase family protein           | Arthrospira platensis str. Paraca                               |                   |                                 |
| ZP_06384291  | nitrogen regulatory protein P-I: InB              | Arthrospira platensis str. Paraca;<br>Arthrospira maxima CS-328 |                   |                                 |
| YP_001801977 | nitrogenase molybdenum-iron protein subunit alpha | Cyanothece sp. ATCC 51142                                       |                   |                                 |
| YP_002380475 | Mo-dependent nitrogenase family protein           | Cyanothece sp. PCC 7424                                         |                   | Carrieri et al.<br>2011         |
| YP_002483083 | nitrogenase iron protein                          | Cyanothece sp. PCC 7425                                         |                   |                                 |
| YP_002483442 | nitrogen regulatory protein P-II                  | Cyanothece sp. PCC 7425                                         |                   |                                 |
| YP_002483085 | nitrogenase molybdenum-iron protein beta chain    | Cyanothece sp. PCC 7425                                         |                   |                                 |
| YP_003886770 | Mo-dependent nitrogenase family protein           | Cyanothece sp. PCC 7822                                         |                   |                                 |
| YP_001801977 | nitrogenase molybdenum-iron protein subunit alpha | Cyanothece sp. ATCC 51142                                       |                   |                                 |
| YP_002380475 | Mo-dependent nitrogenase family protein           | Cyanothece sp. PCC 7424                                         |                   |                                 |
| YP_002483083 | nitrogenase iron protein                          | Cyanothece sp. PCC 7425                                         |                   |                                 |
| YP_002483442 | nitrogen regulatory protein P-II                  | Cyanothece sp. PCC 7425                                         |                   |                                 |
| YP_002483085 | nitrogenase molybdenum-iron protein beta chain    | Cyanothece sp. PCC 7425                                         |                   |                                 |

|                        |                                                      |                                   |               |                          |
|------------------------|------------------------------------------------------|-----------------------------------|---------------|--------------------------|
| YP_003886770           | Mo-dependent nitrogenase family protein              | Cyanothece sp. PCC 7822           |               |                          |
| YP_002371988           | nitrogenase molybdenum-iron protein alpha chain;     | Cyanothece sp. PCC 8801;          |               | Carrieri et al.          |
| YP_003137548           | nitrogenase molybdenum-iron protein alpha chain      | Cyanothece sp. PCC 8802           |               | 2011                     |
| YP_003137727           | Mo-dependent nitrogenase family protein;             | Cyanothece sp. PCC 8802;          |               |                          |
| YP_002372168           | Mo-dependent nitrogenase family protein              | Cyanothece sp. PCC 8801           |               |                          |
| YP_003137542           | nitrogenase cofactor biosynthesis protein NifB;      | Cyanothece sp. PCC 8802 ;         |               |                          |
| YP_002371982           | nitrogenase cofactor biosynthesis protein NifB       | Cyanothece sp. PCC 8801           |               |                          |
| YP_003137549           | nitrogenase molybdenum-iron protein beta chain;      | Cyanothece sp. PCC 8802;          |               |                          |
| YP_002371989           | nitrogenase molybdenum-iron protein beta chain       | Cyanothece sp. PCC 8801           |               |                          |
| YP_003139076           | protein of unknown function nitrogen fixation;       | Cyanothece sp. PCC 8802;          |               |                          |
| YP_002372847           | protein of unknown function nitrogen fixation        | Cyanothece sp. PCC 8801           |               |                          |
|                        |                                                      |                                   |               | Dyhrman et al.           |
| YP_723595              | Mo-dependent nitrogenase-like                        | Trichodesmium erythraeum IMS101   |               | 2006                     |
| YP_723937              | ammonium transporter                                 | Trichodesmium erythraeum IMS101   |               |                          |
| YP_720396              | glutamate synthase (ferredoxin)                      | Trichodesmium erythraeum IMS101   |               |                          |
| YP_720911              | nitrite transporter                                  | Trichodesmium erythraeum IMS101   |               |                          |
|                        |                                                      |                                   |               | Berman-Frank et al. 2003 |
| NP_441331              | global nitrogen regulator                            | Synechocystis sp. PCC 6803        | Chroococcales |                          |
|                        | Nitrogenase molybdenum-iron protein alpha chain:     |                                   | non-          | Dron et al.              |
| ZP_00516387            | Nitrogenase component                                | Crocospaera watsonii WH 8501      | heterocystous | 2012                     |
| YP_001659015           | ammonium/methylammonium permease                     | Microcystis aeruginosa NIES-843   | diazotroph    |                          |
| YP_001656830, CP012375 | Mo-dependent nitrogenase-like                        | Microcystis aeruginosa NIES-2481; |               |                          |
|                        |                                                      | NIES-843                          |               |                          |
| YP_001656830           | Mo-dependent nitrogenase-like                        | Microcystis aeruginosa NIES-843   |               |                          |
| YP_001656527           | periplasmic beta-type carbonic anhydrase             | Microcystis aeruginosa NIES-843   |               |                          |
| YP_001660760           | nitrogen regulatory protein P-II                     | Microcystis aeruginosa NIES-843   |               |                          |
| YP_001656504           | NADH-dependent glutamate synthase small subunit      | Microcystis aeruginosa NIES-843   |               |                          |
| YP_001656491           | nitrate/nitrite transport system ATP-binding protein | Microcystis aeruginosa NIES-843   |               |                          |
| YP_001656941           | glutamate--ammonia ligase                            | Microcystis aeruginosa NIES-843   |               |                          |
| YP_001660812           | hydroxylamine reductase                              | Microcystis aeruginosa NIES-843   |               |                          |
| YP_001657925           | ferredoxin-dependent glutamate synthase              | Microcystis aeruginosa NIES-843   |               |                          |
| YP_001655197           | global nitrogen regulator Ycf28                      | Microcystis aeruginosa NIES-843   |               |                          |

|           |                                                |                                    |                          |
|-----------|------------------------------------------------|------------------------------------|--------------------------|
|           |                                                | Synechococcus elongatus PCC 7942;  |                          |
| YP_399340 | nitrogen regulatory protein P-II;              | Synechococcus elongatus PCC 6301   | Synechococcales Fay 1992 |
| YP_171902 | nitrogen regulatory protein P-II               |                                    |                          |
| YP_476682 | nitrogenase molybdenum-iron protein beta chain | Synechococcus sp. JA-2-3B"a(2-13)  | non-heterocystous        |
| YP_478892 | nitrogen regulatory protein P-II;              | Synechococcus sp. JA-2-3B"a(2-13); |                          |
| YP_474937 | nitrogen regulatory protein P-II               | Synechococcus sp. JA-3-3Ab         | diazotroph               |

<sup>1</sup>cut-off values of a maximum e-value of 1e-5, a minimum identity of 60% and a minimum alignment length of 15 measured in amino acid for protein and base pair for RNA databases

## References

- Schrautemeier, B., Neveling, U., & Schmitz, S. (1995). Distinct and differently regulated Mo-dependent nitrogen-fixing systems evolved for heterocysts and vegetative cells of *Anabaena variabilis* ATCC 29413: characterization of the fdxH1/2 gene regions as part of the nif1/2 gene clusters. *Molecular microbiology*, *18*(2), 357-369.
- Summers, M. L., Wallis, J. G., Campbell, E. L., & Meeks, J. C. (1995). Genetic evidence of a major role for glucose-6-phosphate dehydrogenase in nitrogen fixation and dark growth of the cyanobacterium *Nostoc* sp. strain ATCC 29133. *Journal of bacteriology*, *177*(21), 6184-6194.
- Willis, A., Chuang, A. W., & Burford, M. A. (2016). Nitrogen fixation by the diazotroph *Cylindrospermopsis raciborskii* (Cyanophyceae). *Journal of phycology*, *52*(5), 854-862.
- Vintila, S., & El-Shehaw, R. (2007). Ammonium ions inhibit nitrogen fixation but do not affect heterocyst frequency in the bloom-forming cyanobacterium *Nodularia spumigena* strain AV1. *Microbiology*, *153*(11), 3704-3712.
- Carrieri, D., Wawrousek, K., Eckert, C., Yu, J., & Maness, P. C. (2011). The role of the bidirectional hydrogenase in cyanobacteria. *Bioresource technology*, *102*(18), 8368-8377.
- Dyrman, S. T., Chappell, P. D., Haley, S. T., Moffett, J. W., Orchard, E. D., Waterbury, J. B., & Webb, E. A. (2006). Phosphonate utilization by the globally important marine diazotroph *Trichodesmium*. *Nature*, *439*(7072), 68.
- Berman-Frank, I., Lundgren, P., & Falkowski, P. (2003). Nitrogen fixation and photosynthetic oxygen evolution in cyanobacteria. *Research in microbiology*, *154*(3), 157-164.
- Dron, A., Rabouille, S., Claquin, P., Le Roy, B., Talec, A., & Sciandra, A. (2012). Light-dark (12: 12) cycle of carbon and nitrogen metabolism in *Crocospaera watsonii* WH8501: relation to the cell cycle. *Environmental microbiology*, *14*(4), 967-981.
- Fay, P. (1992). Oxygen relations of nitrogen fixation in cyanobacteria. *Microbiological reviews*, *56*(2), 340-373.

Table S4 Correlations between the abundances of genera associated with nitrogenase and phosphorus transportation (P<0.10 with blue highlights), and among those associated with nitrogenase or phosphorus transportation, respectively (P<0.10 with yellow highlights)

|                               | <i>Cynaot hece,</i><br>P | <i>Cynaot hece,</i><br>N | <i>Microcy stis,</i><br>P | <i>Microcy stis,</i><br>N | <i>Synecho coccus,</i><br>P | <i>Synecho coccus,</i><br>N | <i>Synecho cystis,</i><br>P | <i>Synecho cystis,</i><br>N | <i>Trichod esmium,</i><br>P | <i>Trichod esmium,</i><br>N | <i>Nostoc,</i><br>P | <i>Nostoc,</i><br>N | <i>Anabaena,</i><br>P | <i>Anabaena,</i><br>N | <i>Cylindr ospermo psis,</i><br>P | <i>Cylindr ospermo psis,</i><br>N | <i>Nodular ia,</i><br>P | <i>Nodular ia,</i><br>N |
|-------------------------------|--------------------------|--------------------------|---------------------------|---------------------------|-----------------------------|-----------------------------|-----------------------------|-----------------------------|-----------------------------|-----------------------------|---------------------|---------------------|-----------------------|-----------------------|-----------------------------------|-----------------------------------|-------------------------|-------------------------|
| <i>Cynaothece</i> , P         | 1.000                    | 0.001                    | -0.048                    | -0.091                    | -0.163                      | 0.627<br>(P=0.007)          | 0.270                       | 0.176                       | 0.277                       | -0.199                      | 0.523<br>(P=0.031)  | 0.142               | 0.409                 | 0.222                 | 0.153                             | -0.086                            | -0.026                  | -0.049                  |
| <i>Cynaothece</i> , N         | 0.001                    | 1.000                    | -0.006                    | 0.425<br>(P=0.089)        | -0.083                      | 0.183                       | -0.182                      | -0.149                      | 0.098                       | -0.088                      | 0.169               | 0.906<br>(P=0.000)  | 0.275                 | 0.838<br>(P=0.000)    | -0.065                            | 0.686<br>(P=0.002)                | 0.136                   | 0.781<br>(P=0.000)      |
| <i>Microcystis</i> , P        | -0.048                   | -0.006                   | 1.000                     | 0.452<br>(P=0.068)        | 0.432                       | -0.300                      | 0.357                       | 0.201                       | 0.165                       | -0.198                      | 0.453<br>(P=0.068)  | -0.040              | 0.570<br>(P=0.017)    | 0.024                 | 0.002                             | -0.073                            | 0.327                   | -0.097                  |
| <i>Microcystis</i> , N        | -0.091                   | 0.425<br>(P=0.089)       | 0.452<br>(P=0.068)        | 1.000                     | -0.092                      | -0.223                      | 0.200                       | -0.114                      | 0.098                       | -0.114                      | 0.063               | 0.282               | 0.005                 | 0.363                 | -0.021                            | 0.169                             | 0.310                   | 0.201                   |
| <i>Synechococcus</i> , P      | -0.163                   | -0.083                   | 0.432                     | -0.092                    | 1.000                       | -0.079                      | -0.209                      | -0.151                      | -0.332                      | 0.125                       | -0.105              | 0.034               | 0.347                 | 0.134                 | -0.134                            | 0.319                             | 0.063                   | 0.025                   |
| <i>Synechococcus</i> , N      | 0.627<br>(P=0.007)       | 0.183                    | -0.300                    | -0.223                    | -0.079                      | 1.000                       | 0.019                       | -0.123                      | -0.047                      | -0.123                      | 0.199               | 0.324               | 0.450<br>(P=0.070)    | 0.304                 | 0.266                             | 0.197                             | -0.026                  | 0.133                   |
| <i>Synechocystis</i> , P      | 0.270                    | -0.182                   | 0.357                     | 0.200                     | -0.209                      | 0.019                       | 1.000                       | 0.073                       | 0.059                       | 0.038                       | 0.287               | -0.227              | 0.108                 | -0.224                | -0.087                            | -0.387                            | 0.616                   | -0.301                  |
| <i>Synechocystis</i> , N      | 0.176                    | -0.149                   | 0.201                     | -0.114                    | -0.151                      | -0.123                      | 0.073                       | 1.000                       | 0.663<br>(P=0.004)          | -0.063                      | 0.367               | -0.165              | 0.270                 | -0.122                | 0.547<br>(P=0.023)                | -0.194                            | -0.145                  | 0.017                   |
| <i>Trichodesmium</i> , P      | 0.277                    | 0.098                    | 0.165                     | 0.098                     | -0.332                      | -0.047                      | 0.059                       | 0.663<br>(P=0.004)          | 1.000                       | -0.185                      | 0.395               | 0.095               | 0.171                 | 0.170                 | 0.411                             | 0.051                             | -0.053                  | -0.071                  |
| <i>Trichodesmium</i> , N      | -0.199                   | -0.088                   | -0.198                    | -0.114                    | 0.125                       | -0.123                      | 0.038                       | -0.063                      | -0.185                      | 1.000                       | -0.240              | -0.171              | -0.224                | -0.187                | -0.152                            | -0.099                            | 0.298                   | -0.152                  |
| <i>Nostoc</i> , P             | 0.523<br>(P=0.031)       | 0.169                    | 0.453                     | 0.063                     | -0.105                      | 0.199                       | 0.287                       | 0.367                       | 0.395                       | -0.240                      | 1.000               | 0.204               | 0.741<br>(P=0.000)    | 0.194                 | 0.450                             | 0.018                             | 0.128                   | -0.013                  |
| <i>Nostoc</i> , N             | 0.142                    | 0.906<br>(P=0.000)       | -0.040                    | 0.282                     | 0.034                       | 0.324                       | -0.227                      | -0.165                      | 0.095                       | -0.171                      | 0.204               | 1.000               | 0.328                 | 0.964<br>(P=0.000)    | -0.051                            | 0.835<br>(P=0.000)                | -0.023                  | 0.649<br>(P=0.005)      |
| <i>Anabaena</i> , P           | 0.409                    | 0.275                    | 0.570<br>(P=0.017)        | 0.005                     | 0.347                       | 0.450<br>(P=0.070)          | 0.108                       | 0.270                       | 0.171                       | -0.224                      | 0.741<br>(P=0.000)  | 0.328               | 1.000                 | 0.318                 | 0.335                             | 0.207                             | 0.138                   | 0.184                   |
| <i>Anabaena</i> , N           | 0.222                    | 0.838<br>(P=0.000)       | 0.024                     | 0.363                     | 0.134                       | 0.304                       | -0.224                      | -0.122                      | 0.170                       | -0.187                      | 0.194               | 0.964<br>(P=0.000)  | 0.318                 | 1.000                 | 0.008                             | 0.866<br>(P=0.000)                | 0.009                   | 0.582<br>(P=0.014)      |
| <i>Cylindrospermopsis</i> , P | 0.153                    | -0.065                   | 0.002                     | -0.021                    | -0.134                      | 0.266                       | -0.087                      | 0.547<br>(P=0.023)          | 0.411                       | -0.152                      | 0.450<br>(P=0.070)  | -0.051              | 0.335                 | 0.008                 | 1.000                             | 0.120                             | -0.018                  | -0.021                  |
| <i>Cylindrospermopsis</i> , N | -0.086                   | 0.686<br>(P=0.002)       | -0.073                    | 0.169                     | 0.319                       | 0.197                       | -0.387                      | -0.194                      | 0.051                       | -0.099                      | 0.018               | 0.835<br>(P=0.000)  | 0.207                 | 0.866<br>(P=0.000)    | 0.120                             | 1.000                             | -0.042                  | 0.425<br>(P=0.089)      |
| <i>Nodularia</i> , P          | -0.026                   | 0.136                    | 0.327                     | 0.310                     | 0.063                       | -0.026                      | 0.616<br>(P=0.008)          | -0.145                      | -0.053                      | 0.298                       | 0.128               | -0.023              | 0.138                 | 0.009                 | -0.018                            | -0.042                            | 1.000                   | -0.070                  |
| <i>Nodularia</i> , N          | -0.049                   | 0.781<br>(P=0.000)       | -0.097                    | 0.201                     | 0.025                       | 0.133                       | -0.301                      | 0.017                       | -0.071                      | -0.152                      | -0.013              | 0.649<br>(P=0.005)  | 0.184                 | 0.582<br>(P=0.014)    | -0.021                            | 0.425<br>(P=0.089)                | -0.070                  | 1.000                   |
